# Supplementary material for: Navigating Ear Rot Disease: Solutions for Increasing Corn Yield in Sandy Soil
Source: Research Square preprint supplement (doi:10.21203/rs.3.rs-7066964/v1), 2025-07-08
Supplement: Supplementary file 1 [file 5d379ff634411bab2ae9ee3b.docx]

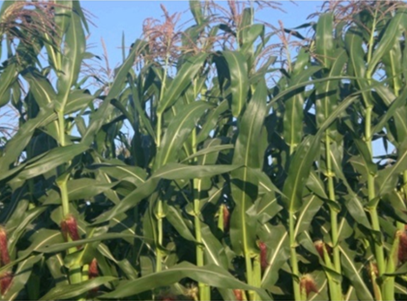


Image of the field experiment depicting the tasseling and silking stages, and ear leaf under sandy soil conditions.


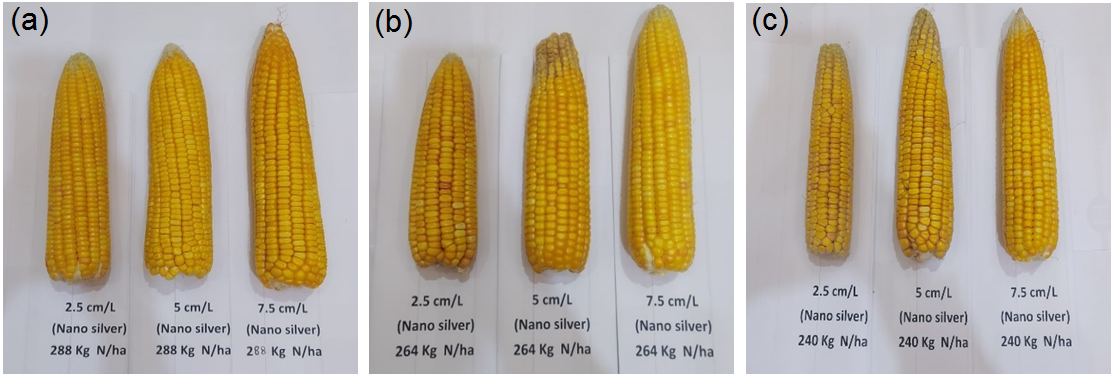


The impact of different N fertilizer rates combined with Ag NPs rates on the shape and size of corn ears. The best size and shape were observed with 288 kg N and 7.5 cm/L of Ag NPs, with minimal differences between 264 kg N with 7.5 cm/L Ag NPs and 288 kg N with three rates of Ag NPs.
